# Supplementary material for: Heterogeneity of tumor-infiltrating lymphocytes ascribed to local immune status rather than neoantigens by multi-omics analysis of glioblastoma multiforme
Source: PubMed Central journal article supplement (PMC5537248; doi:10.1038/s41598-017-05538-z), 2017-07-31
Supplement: 41598_2017_5538_MOESM1_ESM.pdf [file 41598_2017_5538_MOESM1_ESM.pdf]

## Heterogeneity of tumor-infiltrating lymphocytes ascribed to local immune status rather than neoantigens by multi-omics analysis of glioblastoma multiforme

Lin Feng\*, Haipeng Qian\*, Xuexin Yu\*, Kan Liu, Ting Xiao, Chengli Zhang, Manchao Kuang, Shujun Cheng, Xueji Li#, Jinghai Wan#, Kaitai Zhang#

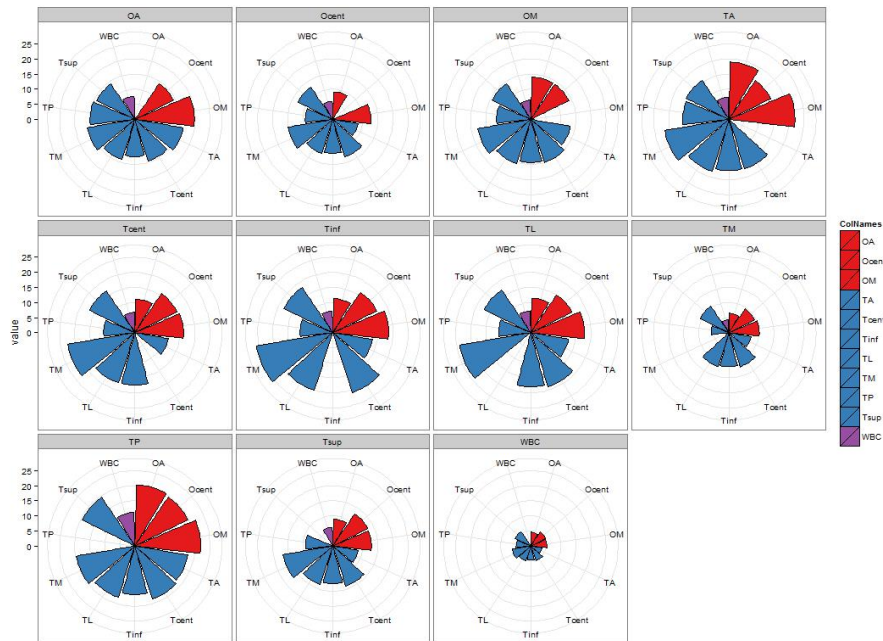

Figure S1: The overlap of the TCRB clones between pairwise samples. Each of the rose diagram displays the percentage of the overlapped TCRB clones between the sample named the panel (the sample marked in the grey bar of the panel) and the other samples (listed around the petals). The proportions of the overlap are represented by the length of petals, with red, blue and purple indicating the occipital, temporal tumor samples and peripheral blood, respectively.

OA

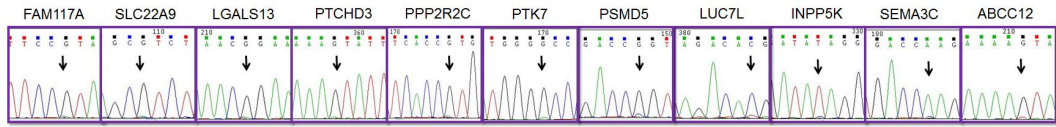

Ocent

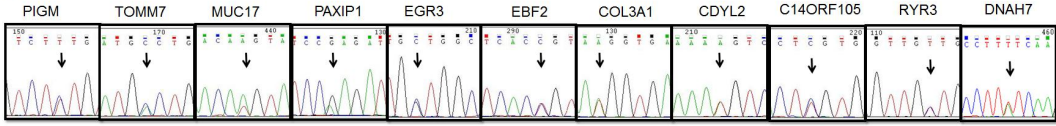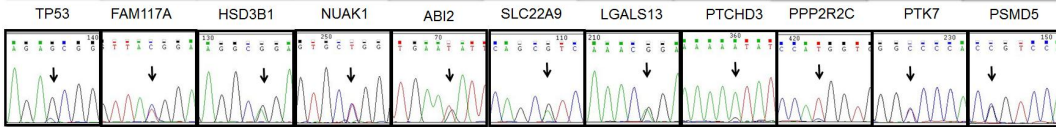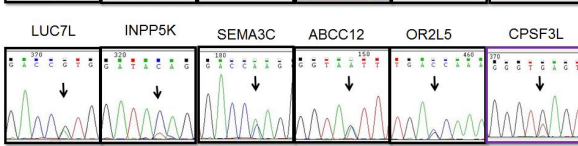

OM

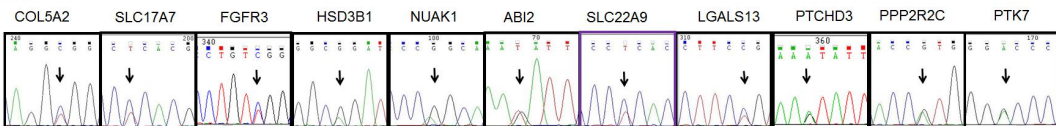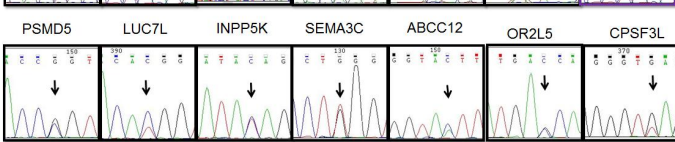

Tcent

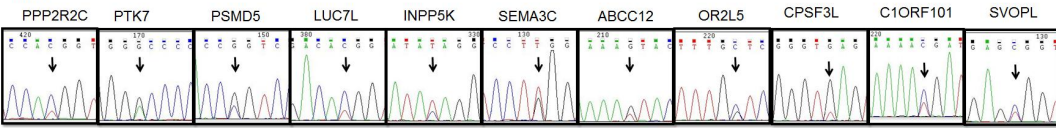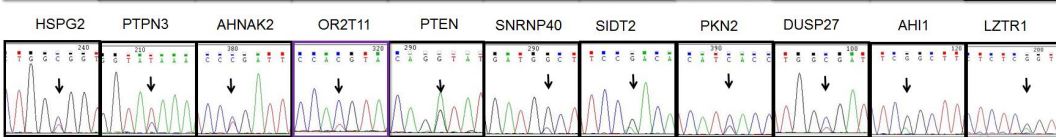

Tsup

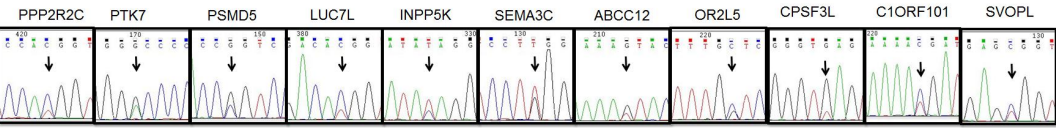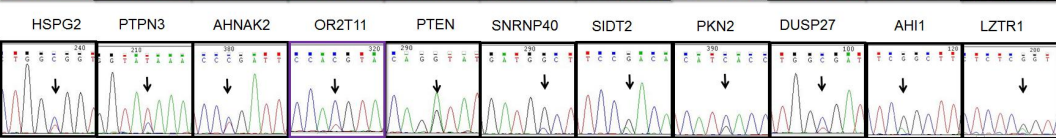

Tsup

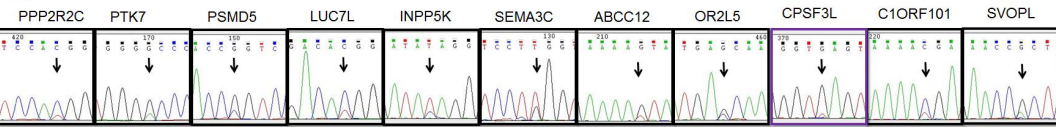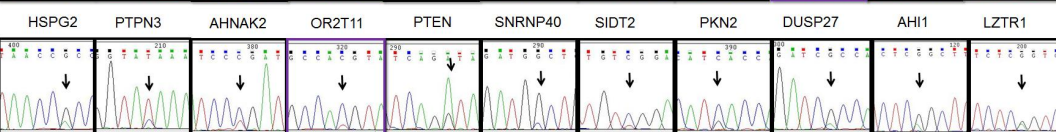

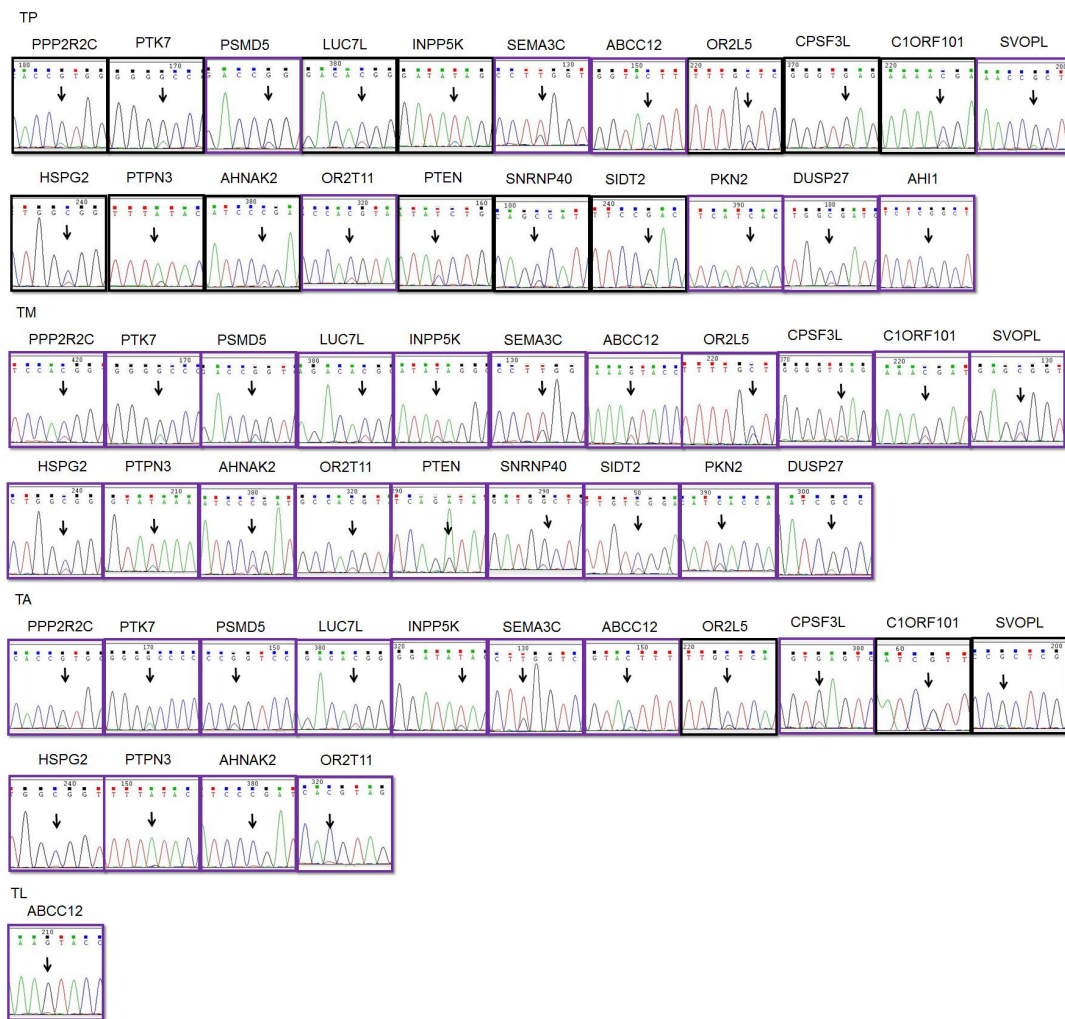

Figure S2: Sanger sequencing validation of mutations identified by exome sequencing in Patient 1. The figure shows the mutations in each regional tumor samples displayed on Figure 4A validated using Sanger sequencing. Mutations are indicated with an arrow. The color of the outliers indicate whether the mutations were discovered by NGS (black for yes, purple for no).

TableS1\_Clinical\_Information

| Patient ID | Gender | Age | Overall survival (months) | Events (dead = 1) | Disease free survival (months) | Events (relapse = 1) | Cluster |
|------------|--------|-----|---------------------------|-------------------|--------------------------------|----------------------|---------|
| Patient 1  | M      | 51  | 25.00                     | 0                 | 25.00                          | 1                    | NA      |
| GBM01      | F      | 49  | 17.29                     | 1                 | 9.14                           | 1                    | red     |
| GBM02      | F      | 35  | 42.71                     | 0                 | 33.11                          | 1                    | black   |
| GBM03      | M      | 46  | 12.53                     | 1                 | 6.64                           | 1                    | red     |
| GBM04      | M      | 64  | 8.32                      | 1                 | 8.32                           | 1                    | red     |
| GBM05      | F      | 35  | 13.58                     | 1                 | 10.42                          | 1                    | red     |
| GBM06      | M      | 54  | 25.55                     | 1                 | 22.85                          | 1                    | black   |
| GBM07      | M      | 32  | 46.26                     | 1                 | 37.87                          | 1                    | black   |
| GBM08      | M      | 61  | 31.63                     | 0                 | 9.11                           | 1                    | red     |
| GBM09      | F      | 42  | 4.47                      | 1                 | 1.45                           | 1                    | red     |
| GBM10      | F      | 42  | 16.64                     | 1                 | 11.05                          | 1                    | red     |
| GBM11      | M      | 56  | 18.21                     | 1                 | 15.09                          | 1                    | red     |
| GBM12      | F      | 28  | 42.87                     | 0                 | 42.87                          | 0                    | black   |
| GBM13      | M      | 55  | 12.59                     | 1                 | 8.12                           | 1                    | red     |
| GBM14      | F      | 45  | 34.92                     | 0                 | 34.92                          | 0                    | red     |
| GBM15      | M      | 59  | 16.34                     | 1                 | 11.24                          | 1                    | black   |
| GBM16      | F      | 39  | 13.25                     | 1                 | 7.40                           | 1                    | red     |
| GBM17      | M      | 56  | 6.51                      | 1                 | 3.55                           | 1                    | red     |
| GBM18      | M      | 62  | 10.68                     | 1                 | 10.68                          | 1                    | red     |
| GBM19      | F      | 44  | 33.67                     | 1                 | 23.47                          | 1                    | red     |
| GBM20      | M      | 38  | 11.70                     | 1                 | 8.05                           | 1                    | black   |
| GBM21      | M      | 37  | 27.16                     | 1                 | 27.16                          | 1                    | red     |
| GBM22      | F      | 24  | 21.99                     | 0                 | 21.99                          | 0                    | red     |
| GBM23      | M      | 37  | 7.99                      | 1                 | 7.99                           | 1                    | red     |
| GBM24      | F      | 58  | 13.02                     | 1                 | 13.02                          | 1                    | red     |
| GBM25      | F      | 38  | 35.80                     | 1                 | 30.77                          | 1                    | black   |
| GBM26      | M      | 42  | 13.78                     | 1                 | 3.55                           | 1                    | black   |
| GBM27      | NA     | 43  | 25.97                     | 0                 | 25.97                          | 0                    | black   |
| GBM28      | F      | 35  | 19.20                     | 1                 | 19.20                          | 1                    | red     |
| GBM29      | M      | 59  | 17.52                     | 1                 | 10.26                          | 1                    | red     |
| GBM30      | F      | 60  | 17.42                     | 1                 | 9.93                           | 1                    | black   |
| GBM31      | F      | 56  | 15.78                     | 0                 | 15.78                          | 0                    | red     |
| GBM32      | F      | 45  | 9.24                      | 1                 | 3.02                           | 1                    | red     |
| GBM33      | F      | 57  | 15.19                     | 1                 | 5.88                           | 1                    | red     |
| GBM34      | M      | 18  | 42.44                     | 0                 | 42.44                          | 0                    | black   |
| GBM35      | F      | 43  | 9.21                      | 0                 | 9.21                           | 0                    | black   |
| GBM36      | F      | 40  | 18.51                     | 1                 | 12.85                          | 1                    | red     |
| GBM37      | F      | 33  | 18.58                     | 1                 | 18.58                          | 1                    | red     |

|           |     |    |       |   |       |   |       |
|-----------|-----|----|-------|---|-------|---|-------|
| GBM38     | F   | 57 | 11.93 | 1 | 11.93 | 1 | red   |
| GBM39     | F   | 27 | 18.05 | 1 | 7.99  | 1 | black |
| GBM40     | M   | 47 | 19.50 | 1 | 12.99 | 1 | black |
| GBM41     | F   | 54 | 22.82 | 0 | 20.71 | 1 | red   |
| GBM42     | M   | 40 | 6.18  | 1 | 3.25  | 1 | red   |
| GBM43     | M   | 52 | 11.05 | 1 | 3.78  | 1 | red   |
| GBM44     | F   | 43 | 19.43 | 1 | 16.96 | 1 | red   |
| GBM45     | F   | 68 | 9.86  | 1 | 7.30  | 1 | red   |
| GBM46     | M   | 28 | 21.44 | 0 | 21.44 | 0 | black |
| GBM47     | M   | 38 | 31.76 | 1 | 12.49 | 1 | red   |
| GBM48     | M   | 52 | 11.11 | 1 | 2.14  | 1 | red   |
| GBM49     | M   | 55 | 12.69 | 1 | 7.10  | 1 | red   |
|           |     |    |       |   |       |   |       |
| NA:       | not |    |       |   |       |   |       |
| available |     |    |       |   |       |   |       |

TableS2\_TCR\_Sequencing\_Primer

| primer name | sequence                                        |
|-------------|-------------------------------------------------|
| TRBV1Fo     | AATGAAACGTGAGCATCTGG                            |
| TRBV2Fo     | GTGTCCCATCTCTAATCAC                             |
| TRBV3Fo     | TATGTATTGGTATAAACAGG                            |
| TRBV4Fo     | GTCTTTGAAATGTGAACAAC                            |
| TRBV5Fo     | GATCAAAACGAGAGGACAGC                            |
| TRBV6aFo    | GTGTGCCCAGGATATGAACC                            |
| TRBV6bFo    | CAGGATATGAGACATAATGC                            |
| TRBV7Fo     | CTCAGGTGTGATCCAATTC                             |
| TRBV9Fo     | GAGACCTCTCTGTGTACTGG                            |
| TRBV10Fo    | GGAATCACCCAGAGCCCAAG                            |
| TRBV11Fo    | CCTAAGGATCGATTTTCTGC                            |
| TRBV12Fo    | AGGTGACAGAGATGGGACAA                            |
| TRBV13Fo    | CTATCCTATCCCTAGACACG                            |
| TRBV14Fo    | AGATGTGACCCAATTTCTGG                            |
| TRBV15Fo    | TCAGACTTTGAACCATAACG                            |
| TRBV16Fo    | TATTGTGCCCAATAAAAGG                             |
| TRBV17Fo    | ATCCATCTTCTGGTCACATG                            |
| TRBV18Fo    | GCAGCCCAATGAAAGGACAC                            |
| TRBV19Fo    | TGAACAGAATTTGAACCACG                            |
| TRBV20Fo    | TCGAGTGCCGTTCCCTGGAC                            |
| TRBV21Fo    | GCAAAGATGGATTGTGTTC                             |
| TRBV23Fo    | CATTTGGTCAAAGGAAAAGG                            |
| TRBV24Fo    | ATGCTGGAATGTTCTCAGAC                            |
| TRBV25Fo    | CTCTGGAATGTTCTCAAACC                            |
| TRBV26Fo    | CCCAGAATATGAATCATGTT                            |
| TRBV27Fo    | TTGTTCTCAGAATATGMCC                             |
| TRBV28Fo    | ATGTGTCCAGGATATGGACC                            |
| TRBV29Fo    | TCACCATGATGTTCTGGTAC                            |
| TRBV30Fo    | TGTGGAGGGAACATCAAACC                            |
| TRBCRo      | GTGTGGCCTTTTGGGTGTGG                            |
| TRBV1Fi     | TCTTCCCTACACGACGCTCTCCGATCTCATTGAAAACAAGACTGTGC |
| TRBV2Fi     | TCTTCCCTACACGACGCTCTCCGATCTTGAAATCTCAGAGAAGTCTG |
| TRBV3Fi     | TCTTCCCTACACGACGCTCTCCGATCTCTAAGAAATTTCTGAAGA   |
| TRBV4Fi     | TCTTCCCTACACGACGCTCTCCGATCTGGAGCTCATGTTTGCTACA  |
| TRBV5aFi    | TCTTCCCTACACGACGCTCTCCGATCTCAGGGGCCCCAGTTTATCTT |
| TRBV5bFi    | TCTTCCCTACACGACGCTCTCCGATCTGAAACARAGGAAACTTCCCT |
| TRBV6aFi    | TCTTCCCTACACGACGCTCTCCGATCTGGTATCGACAAGACCCAGGC |
| TRBV6bFi    | TCTTCCCTACACGACGCTCTCCGATCTTAGACAAGATCTAGGACTGG |
| TRBV7aFi    | TCTTCCCTACACGACGCTCTCCGATCTTCTAATTTACTTCCAAGGCA |
| TRBV7bFi    | TCTTCCCTACACGACGCTCTCCGATCTCCAGAGTGATGCTCAACG   |

|           |                                                         |
|-----------|---------------------------------------------------------|
| TRBV7CFi  | TCTTCCCTACACGACGCTCTCCGATCTACTTCAATTATGAAGC             |
| TRBV7dFi  | TCTTCCCTACACGACGCTCTCCGATCTCCAGAATGAAGCTCAACTAG         |
| TRBV9Fi   | TCTTCCCTACACGACGCTCTCCGATCTCTCATTAGTATTATAATGG          |
| TRBV10Fi  | TCTTCCCTACACGACGCTCTCCGATCTGACATGGGCTGAGGCTGATC         |
| TRBV11Fi  | TCTTCCCTACACGACGCTCTCCGATCTACTCTCAAGATCCAGCCTGC         |
| TRBV12aFi | TCTTCCCTACACGACGCTCTCCGATCTTGCAGGGACTGGAATTGCTG         |
| TRBV12bFi | TCTTCCCTACACGACGCTCTCCGATCTGTACAGACAGACCATGATGC         |
| TRBV13Fi  | TCTTCCCTACACGACGCTCTCCGATCTAAGATGCAGAGCGATAAAGG         |
| TRBV14Fi  | TCTTCCCTACACGACGCTCTCCGATCTAGTCTAAACAGGATGAGTCC         |
| TRBV15Fi  | TCTTCCCTACACGACGCTCTCCGATCTAAAGATTTTAAACAATGAAGC        |
| TRBV16Fi  | TCTTCCCTACACGACGCTCTCCGATCTAATGTCTTTGATGAAACAGG         |
| TRBV17Fi  | TCTTCCCTACACGACGCTCTCCGATCTAACATTGCAGTTGATTCAGG         |
| TRBV18Fi  | TCTTCCCTACACGACGCTCTCCGATCTAATATCATAGATGAGTCAGG         |
| TRBV19Fi  | TCTTCCCTACACGACGCTCTCCGATCTTTTCAGAAAGGAGATATAGC         |
| TRBV20Fi  | TCTTCCCTACACGACGCTCTCCGATCTGATGGCAACTTCCAATGAGG         |
| TRBV21Fi  | TCTTCCCTACACGACGCTCTCCGATCTCGCTGGAAGAAGAGCTCAAG         |
| TRBV23Fi  | TCTTCCCTACACGACGCTCTCCGATCTGAATGAACAAGTTCTTCAAG         |
| TRBV24Fi  | TCTTCCCTACACGACGCTCTCCGATCTGTCAAAGATATAAACAAAGG         |
| TRBV25Fi  | TCTTCCCTACACGACGCTCTCCGATCTTAATTCCACAGAGAAGGGAG         |
| TRBV26Fi  | TCTTCCCTACACGACGCTCTCCGATCTATTACCTGGCACTGGGAGC          |
| TRBV27Fi  | TCTTCCCTACACGACGCTCTCCGATCTTGAGGTGACTGATAAGGGAG         |
| TRBV28Fi  | TCTTCCCTACACGACGCTCTCCGATCTAAAAGGAGATATTCCTGAGG         |
| TRBV29Fi  | TCTTCCCTACACGACGCTCTCCGATCTCTGGACAGAGCCTGACTG           |
| TRBV30Fi  | TCTTCCCTACACGACGCTCTCCGATCTTTCTACTCCGTTGGTATTGG         |
| TRBCRi    | TTCTTAGCGTATTGGAGTCTCTGATGGCTCAAACACAGC                 |
| SuperF    | AATGATACGGCGACCACCGAGATCTACTCTTCCCTACACGACG             |
| SuperR    | CAAGCAGAAGACGGCATAAGAGAT-barcode-GTGACTGGAGTTCAGACGTGTG |

Table S3: TCR sequencing statistics in Patient 1.

| Sample ID        | TCRB total reads count | unique TCRB clones |
|------------------|------------------------|--------------------|
| OA               | 3,707,664              | 71,328             |
| Ocent            | 4,709,566              | 112,211            |
| OM               | 4,445,795              | 100,645            |
| TA               | 2,657,495              | 61,145             |
| Tcent            | 3,303,584              | 93,504             |
| Tinf             | 2,754,626              | 77,886             |
| TL               | 2,925,236              | 87,260             |
| TM               | 4,469,758              | 177,554            |
| TP               | 3,463,513              | 52,372             |
| Tsup             | 4,953,931              | 112,264            |
| Peripheral blood | 3,549,276              | 119,210            |



Table S4. The percentage of TCRB clones with different frequency.

| SID              | TCRB frequency (%) |               |             |           |        |       |
|------------------|--------------------|---------------|-------------|-----------|--------|-------|
|                  | <0.0001%           | 0.0001-0.001% | 0.001-0.01% | 0.01-0.1% | 0.1-1% | >1%   |
| OA               | 72.071             | 22.067        | 4.594       | 1.090     | 0.138  | 0.040 |
| Ocent            | 69.386             | 25.215        | 4.385       | 0.816     | 0.175  | 0.023 |
| OM               | 68.730             | 25.772        | 4.233       | 1.055     | 0.189  | 0.020 |
| TA               | 69.603             | 25.237        | 3.635       | 1.342     | 0.169  | 0.014 |
| Tcent            | 68.282             | 26.524        | 3.828       | 1.163     | 0.194  | 0.009 |
| Tinf             | 68.765             | 25.886        | 3.812       | 1.327     | 0.199  | 0.011 |
| TL               | 70.130             | 24.752        | 3.538       | 1.408     | 0.162  | 0.010 |
| TM               | 73.233             | 21.462        | 4.258       | 0.953     | 0.088  | 0.006 |
| TP               | 71.477             | 23.997        | 3.346       | 0.977     | 0.175  | 0.028 |
| Tsup             | 69.661             | 25.544        | 3.581       | 1.035     | 0.167  | 0.012 |
| Peripheral blood | 68.973             | 25.127        | 5.352       | 0.237     | 0.310  | 0.001 |

TableS5\_WES\_statistics

| Sample ID        | Total clean reads count | Fraction of uniquely mapped on target | Coverage of target region | Average sequencing depth on target | Fraction of target covered with at least 20x |
|------------------|-------------------------|---------------------------------------|---------------------------|------------------------------------|----------------------------------------------|
| OA               | 127,569,986             | 71.20%                                | 99.90%                    | 105.55                             | 96.90%                                       |
| Ocent            | 174,376,592             | 55.70%                                | 99.90%                    | 103.03                             | 96.60%                                       |
| OM               | 137,502,752             | 72.40%                                | 99.90%                    | 106.4                              | 96.80%                                       |
| TA               | 140,455,784             | 71.10%                                | 99.80%                    | 102.9                              | 96.50%                                       |
| Tcent            | 176,887,576             | 55.10%                                | 99.90%                    | 102.64                             | 96.90%                                       |
| Tinf             | 148,604,524             | 62.20%                                | 99.90%                    | 104.62                             | 96.70%                                       |
| TL               | 148,372,760             | 70.80%                                | 99.80%                    | 108.7                              | 96.80%                                       |
| TM               | 131,655,000             | 70.30%                                | 99.80%                    | 103.68                             | 96.70%                                       |
| TP               | 124,374,048             | 72.10%                                | 99.90%                    | 108.1                              | 96.70%                                       |
| Tsup             | 126,660,426             | 72.40%                                | 99.80%                    | 106.61                             | 96.70%                                       |
| Peripheral blood | 131,577,926             | 71.50%                                | 99.90%                    | 106.18                             | 96.80%                                       |

TableS6\_Somatic\_mutations

| Gene      | Chromosome | Position  | Nucleotide Variant | Amino Acid Change |
|-----------|------------|-----------|--------------------|-------------------|
| ABCC12    | 16         | 48162533  | C>A                | S451I             |
| ABI2      | 2          | 204231745 | C>A                | S88Y              |
| AHI1      | 6          | 135778798 | G>A                | R329X             |
| AHNAK2    | 14         | 105420407 | C>T                | G461R             |
| C14orf105 | 14         | 57949844  | C>T                | R111Q             |
| C1orf101  | 1          | 244715979 | G>A                | V298I             |
| CDYL2     | 16         | 80718599  | T>A                | K151M             |
| COL3A1    | 2          | 189872252 | A>T                | K1094N            |
| COL5A2    | 2          | 189904156 | G>A                | A1256V            |
| CPSF3L    | 1          | 1254825   | G>T                | H100N             |
| DNAH7     | 2          | 196825169 | T>A                | E902D             |
| DUSP27    | 1          | 167086736 | G>A                | R126H             |
| EBF2      | 8          | 25898455  | C>T                | G118S             |
| EGR3      | 8          | 22548767  | C>G                | S90T              |
| FAM117A   | 17         | 47788783  | C>T                | R399H             |
| FGFR3     | 4          | 1808859   | C>T                | S652L             |
| HSD3B1    | 1          | 120050160 | C>T                | R21C              |
| HSPG2     | 1          | 22160001  | C>T                | R364G             |
| INPP5K    | 17         | 1413029   | T>C                | Y33C              |
| LGALS13   | 19         | 40095882  | C>T                | R53C              |
| LUC7L     | 16         | 277296    | C>T                | R34H              |
| LZTR1     | 22         | 21343948  | C>T                | R210X             |
| MUC17     | 7          | 100676063 | A>T                | S456C             |
| NUAK1     | 12         | 106461214 | G>A                | P451L             |
| OR2L5     | 1          | 248185656 | G>C                | S136T             |
| OR2T11    | 1          | 248790069 | C>T                | V121M             |
| PAXIP1    | 7          | 154739692 | C>T                | R948Q             |
| PIGM      | 1          | 160000598 | C>T                | R311K             |
| PKN2      | 1          | 89298442  | G>C                | D860H             |
| PPP2R2C   | 4          | 6377562   | G>A                | T144M             |
| PSMD5     | 9          | 123580369 | G>C                | R444G             |
| PTCHD3    | 10         | 27687377  | G>A                | T717I             |
| PTEN      | 10         | 89653782  | A>G                | Y27C              |
| PTK7      | 6          | 43096843  | G>A                | A70T              |
| PTPN3     | 9          | 112216813 | T>C                | I111V             |
| RYR3      | 15         | 34078139  | A>G                | N3182             |
| SEMA3C    | 7          | 80374553  | T>G                | Q638P             |
| SIDT2     | 11         | 117059519 | G>A                | D419N             |

|         |    |           |     |       |
|---------|----|-----------|-----|-------|
| SLC17A7 | 19 | 49934292  | C>T | G457R |
| SLC22A9 | 11 | 63175593  | C>T | T433M |
| SNRNP40 | 1  | 31754318  | G>C | A186G |
| SVOPL   | 7  | 138329502 | C>T | R98H  |
| TOMM7   | 7  | 22857638  | G>T | P45T  |
| TP53    | 17 | 7577095   | G>C | D149E |
